# Supplementary material for: Can the hexamethylhydrazinium dication [Me3N–NMe3]2+ be prepared?
Source: Royal Society of Chemistry journal article supplement (doi:10.1039/b803304h), 2008-01-01

## **Supporting Information**

**for**

**Can the hexamethylhydrazinium dication**

**$[\text{Me}_3\text{N-NMe}_3]^{2+}$  be prepared?**

**by**

***Yun Zhang and Christopher A. Reed***

**(5 pages)**

**Figure S1.**  $^1\text{H}$  NMR spectrum of  $[\text{N}_2\text{Me}_5][\text{OTf}]$ , **2**, in  $\text{CD}_3\text{CN}$ .

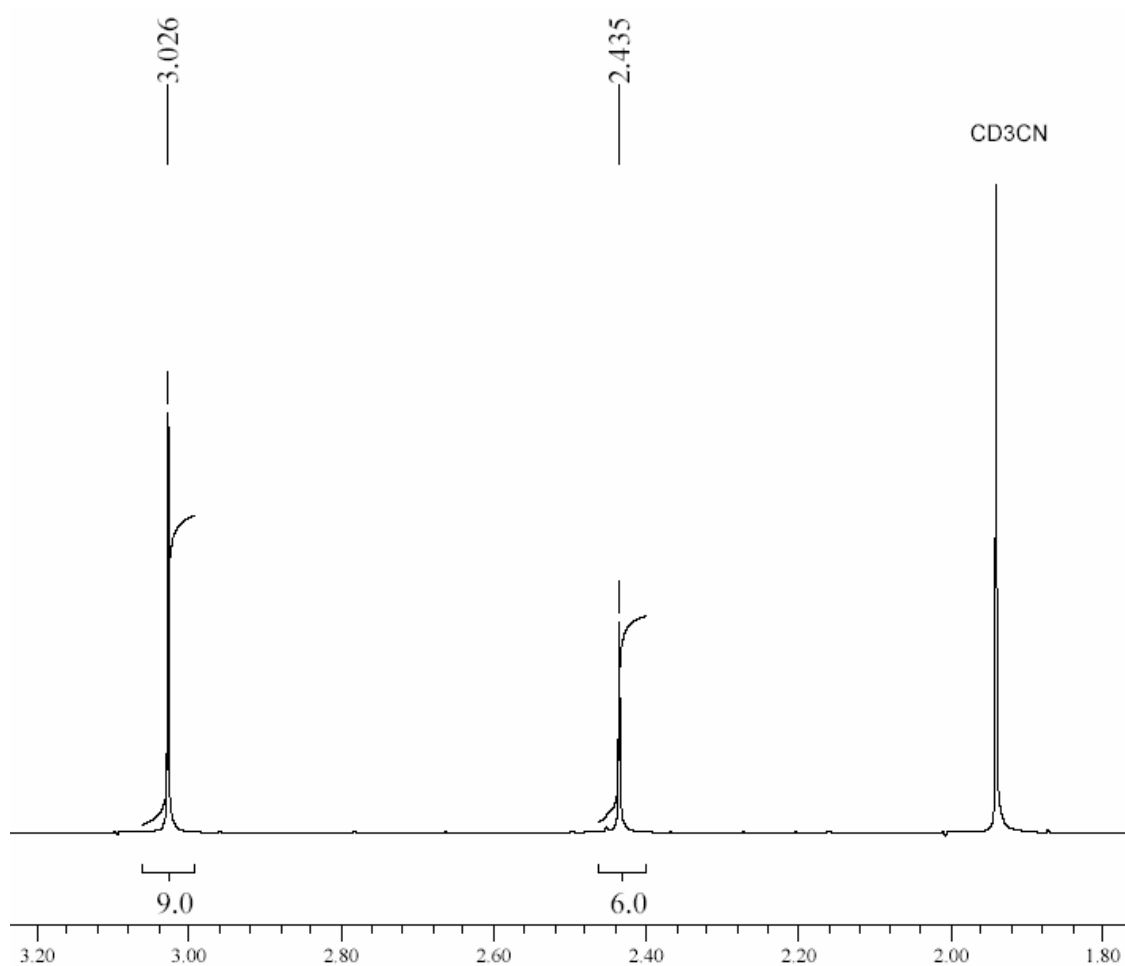

**Figure S2.**  $^1\text{H}$  NMR spectra of (a)  $[(\text{Et}_3\text{Si})\text{Me}_4\text{N}_2][\text{CHB}_{11}\text{Cl}_{11}]$ , **4**, (b)  $[(\text{Et}_3\text{Si})_2\text{Me}_4\text{N}_2][\text{CHB}_{11}\text{Cl}_{11}]_2$ , **5**, dissolved in  $\text{SO}_2$  with  $\text{CD}_2\text{Cl}_2$  as external reference taken at  $-40^\circ\text{C}$ .

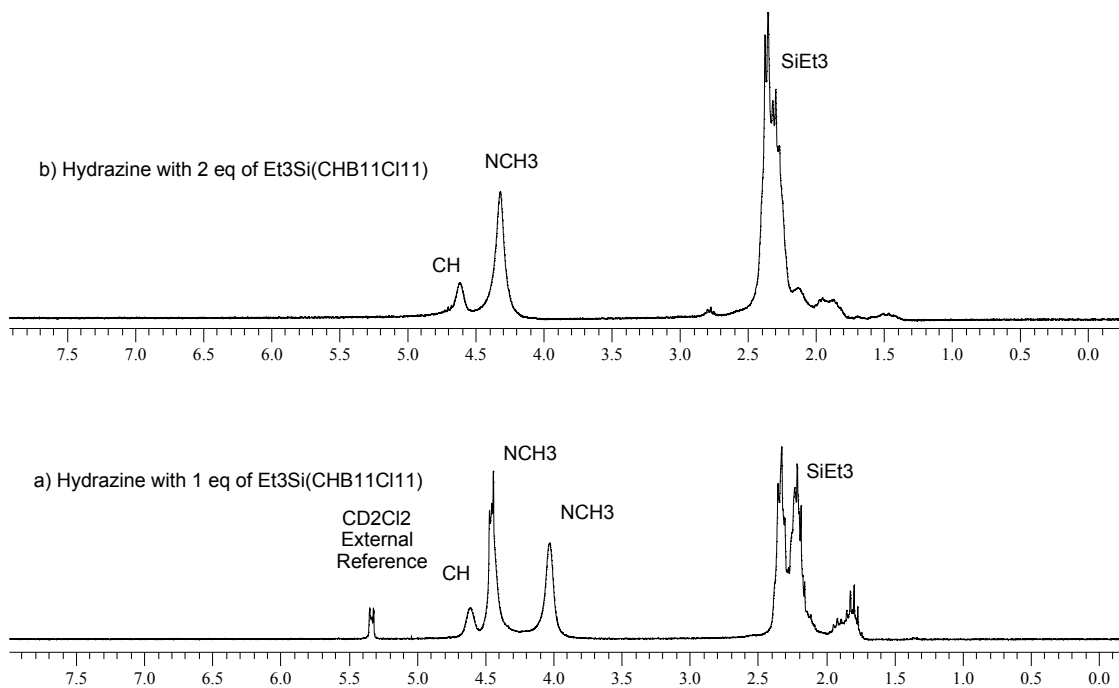

**Figure S3.**  $^1\text{H}$  NMR spectrum of  $[\text{Me}_6\text{N}_2][\text{CHB}_{11}\text{Cl}_{11}]_2$ , **3**, dissolved in  $\text{CD}_2\text{Cl}_2$  at  $-40$   $^\circ\text{C}$ .

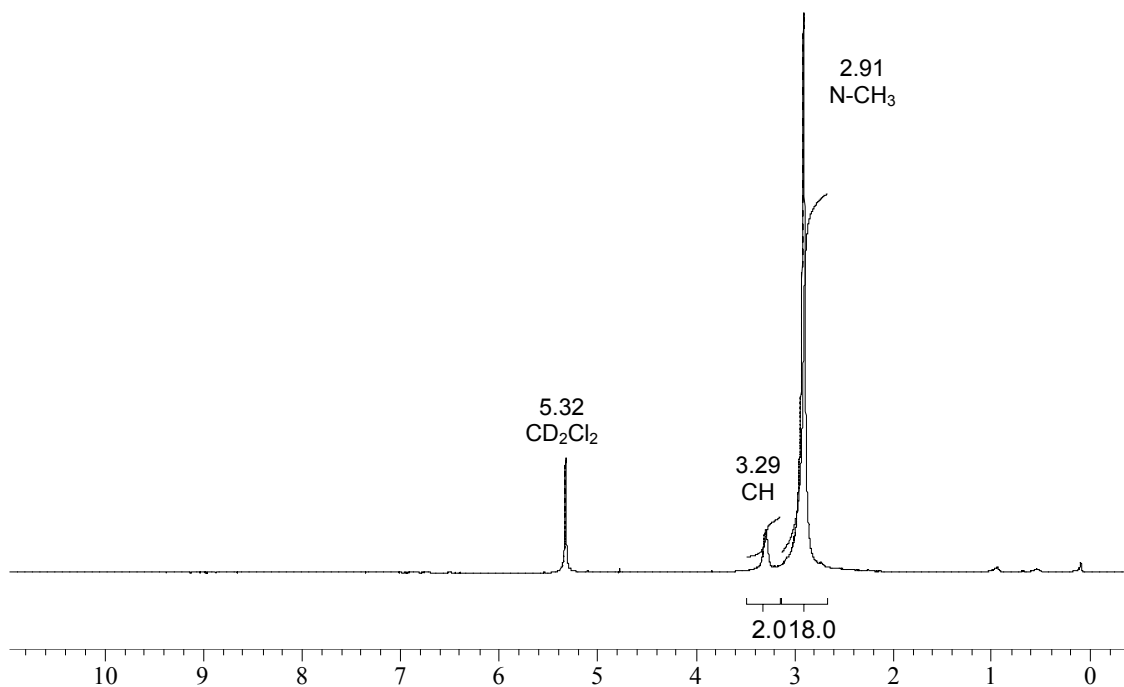

**Figure S4.**  $^1\text{H}$  NMR spectrum of  $[\text{H}_2\text{Me}_4\text{N}_2][\text{CHB}_{11}\text{Cl}_{11}]_2$ , **6**, dissolved in  $\text{CD}_2\text{Cl}_2$ .

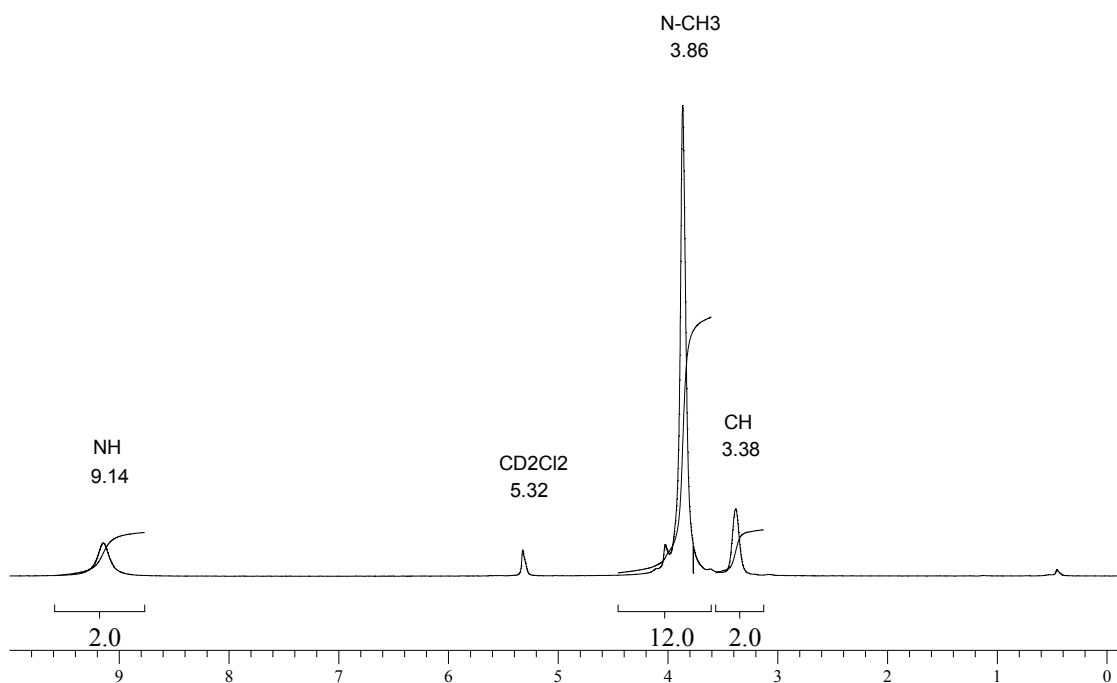

Supplement: b803304h.pdf [file b803304h.pdf]
